# Supplementary material for: One-Step Preparation of Indole-Based Porous Magnetic Composite via Cation-π Interaction-Driven and -Induced Strategy
Source: Research Square preprint supplement (doi:10.21203/rs.3.rs-4098697/v1), 2024-03-18
Supplement: Supplementary file 1 [file 8225670cbeb781e93a514bc4.docx]

**One-Step Preparation of Indole-Based Porous Magnetic Composite via Cation-π Interaction-Driven and -Induced Strategy**

**Yangqing Maoa, b, d, Haoran Zhua, b, c, Boyuan Zhanga, b, c, Ziqi Wua, b, d, Bing Zhaoa, b, d, Rui Yuana, Mingru Zhoud*, Min Zhenga, d, Guanjun Changa*, Yewei Xua, b, d***

*a* *School of Materials and Chemistry & State Key Laboratory of Environmental-friendly Energy Materials & National Engineering Technology Center for Insulation Materials, Southwest University of Science and Technology, Mianyang 621010, PR China*

*b Engineering Research Center of Biomass Materials, Ministry of Education, Southwest University of Science and Technology, Mianyang 621010, PR China*

*c LuZhou North Chemical Industries Co., Ltd., Luzhou 646605, PR China*

*d Sichuan Guanmusiyang New Material Technology Co., Ltd., Mianyang 621010, PR China*

**e-mail:* [*xuyewei@swust.edu.cn*](mailto:xuyewei@swust.edu.cn) *(Yewei Xu);364239709@qq.com (Mingru Zhou);* [*gjchang@mail.ustc.edu.cn*](mailto:gjchang@mail.ustc.edu.cn) *(Guanjun Chang)*

**Procedure for TNT adsorption and regeneration experiment**

The concentration of TNT was determined using the sulfite spectrophotometric method. To quantify the concentration of TNT in solution before and after adsorption, a standard curve of TNT concentration was established (Fig. S1(a)). In the preparation process, 5 mg of TNT was added to a 100 mL volumetric flask, and the volume was adjusted with deionized water to create a 50 mg/L TNT solution. Various volumes (0, 0.625, 1.250, 1.875, 2.500, 3.125, 3.750 mL) of the TNT solution (50 mg/L) were added to seven volumetric flasks. Subsequently, Na2SO3 solution (6.25 mL, 200 g/L), H2SO4 solution (3.75 mL, 55 mmol/L), and an appropriate amount of deionized water were added to achieve a constant volume of 25 mL. The resulting TNT concentrations in the seven volumetric flasks were 0, 1.25, 2.50, 3.75, 5.00, 6.25, and 7.50 mg/L, respectively. Absorption data of these solutions were measured. The intensity of the absorption peak at 415 nm exhibited a linear relationship with TNT concentration: A = 0.00170 + 0.03738 C, where C and A represent TNT concentration and absorption intensity, respectively Fig. S1(b)). According to Lambert-Beer's law, adsorption could be calculated using the linear equation based on the concentration and absorbance values of TNT.


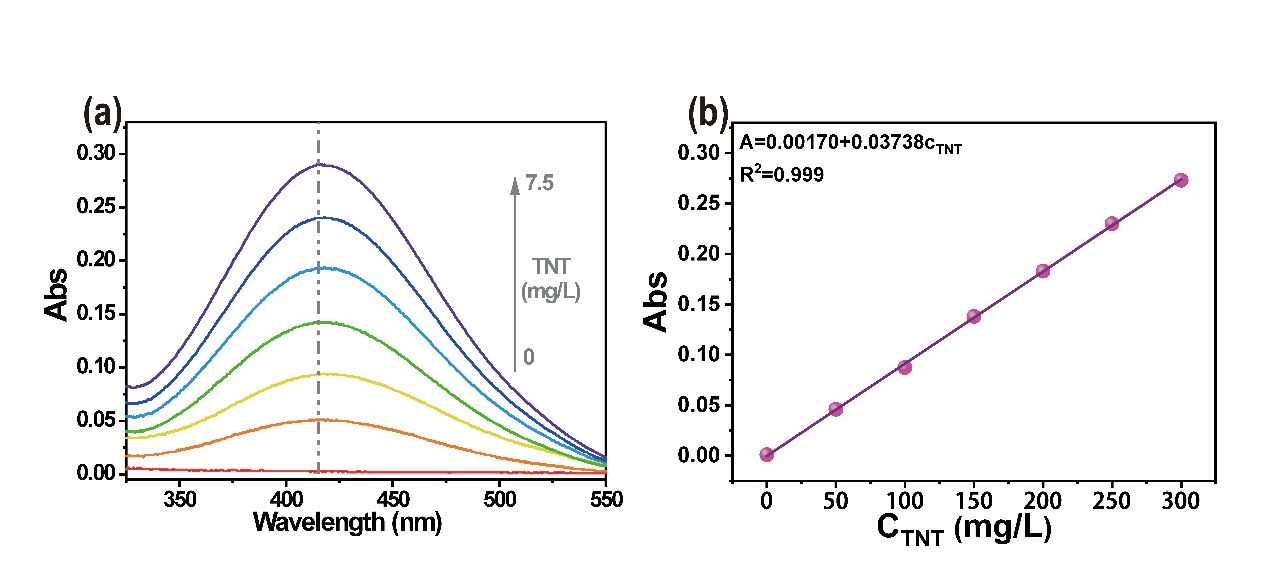


**Fig. S1.** (a) linear relationship between absorbance spectra and TNT concentrations. (b) Absorbance spectra of standard TNT solutions with different concentrations.

In addition to investigating the impact of adsorbent concentration on adsorption capacity, all other experiments were conducted with an adsorbent concentration of 1 g/L. The adsorption equilibrium time of Fe3O4/PIN for TNT was examined by regular sampling over a 12 h period. To assess the influence of the adsorption environment on TNT adsorption capacity, the pH of the solution was adjusted within the range of 2-11. Furthermore, the adsorption capacity at different concentrations was explored by preparing TNT solutions with concentrations of 100, 150, 200, 250, 300, 350, and 400 mg/L. Temperature effects were investigated by conducting experiments at 288, 298, 308, 318, and 328 K. Following each experiment, the adsorbent and solution were separated and filtered using a syringe. The TNT concentration before and after adsorption was determined through sulfite spectrophotometry. The adsorption capacity was calculated using the following equation:

(mg/g) represents the adsorption quantity at adsorption equilibrium. and (mg/L) correspond to the TNT concentration before and after adsorption, respectively. (L) is the solution volume, and m denotes the quality of the absorbent.(g) represent the quality of adsorbent.

In the regeneration experiment, the adsorbent was introduced into a TNT solution (200 mg/L) at a concentration of 1 g/L, and the adsorption quantity was measured once equilibrium was reached. Acetone served as the desorbent, and the saturated adsorbent was separated through centrifugation. The adsorbent was subsequently dried, weighed, and the adsorption-desorption experiment was repeated for further analysis.


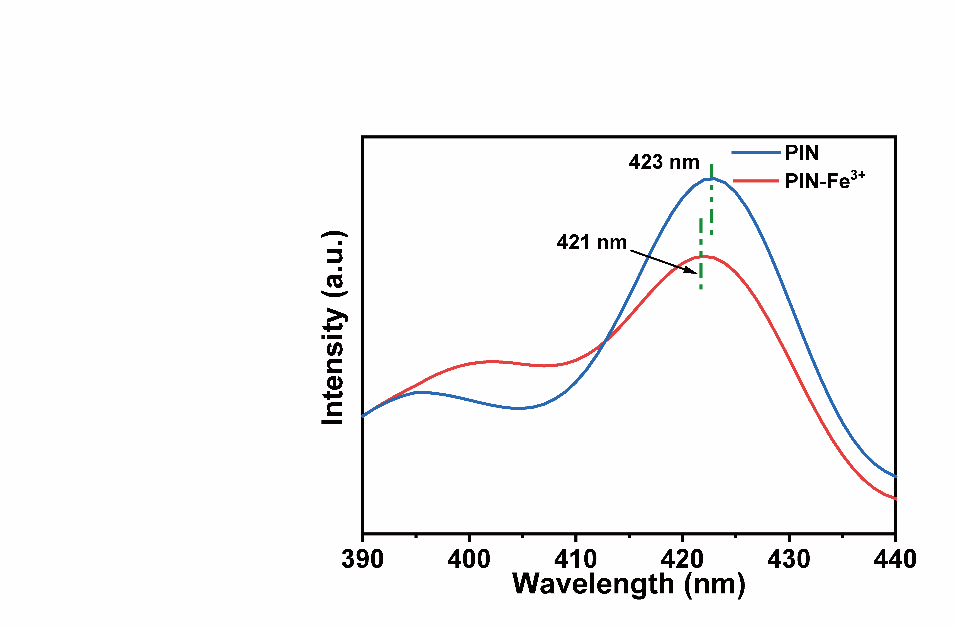


**Fig. S2**  Fluorescence spectra of PIN and PIN-Fe3+.

**The formula required for experimental data processing**

(1)

(2)

(3)

The values denoted as and (mg/g) represent the quantities of TNT absorbed at the initial time and at adsorption equilibrium, respectively. The symbol (h) signifies the duration of contact between the adsorbent and TNT. The parameters (1/h), (g/ (mg h)) and (mg/ (g h1/2)) represent the rate constants. The term (mg/g) is indicative of the intercept as a fixed value.

(4)

(5)

The terms "and (mg/g)" represent the adsorption capacity value at equilibrium and the maximum adsorption capacity value, respectively. The unit (mg/L) signifies the concentration of TNT at equilibrium. Furthermore, (mg/g) and (L/mg) denote the equilibrium constants of the Freundlich and Langmuir models, respectively. Additionally, is a parameter that relates to the adsorption intensity empirically.

(6)

(7)

(8)

(9)

(10)

and (mg/g) stand for the equilibrium adsorption and maximum adsorption value, respectively. (mmol/L) refers to the equilibrium concentration of TNT. represents the equilibrium constant. R is a constant 8.314 (J/ (mol K)), (kJ mol-1), (kJ/mol), and (J/ (mol K)) denote Gibbs free energy, enthalpy change and entropy change, respectively.
